# Supplementary material for: A cell-free artificial anabolic pathway for direct conversion of CO2 to ethanol
Source: Royal Society of Chemistry journal article supplement (doi:10.1039/d3gc03159d), 2023-01-01
Supplement: d3gc03159d1.pdf [file d3gc03159d1.pdf]

## Supplementary Information

### A cell-free artificial anabolic pathway for direct conversion of CO<sub>2</sub> to ethanol

Wanrong Dong<sup>1,2#</sup>, Xiuling Ji<sup>1#</sup>, Yuhong Huang<sup>1\*</sup>, Yaju Xue<sup>1</sup>, Boxia Guo<sup>1</sup>, Dongbo Cai<sup>2</sup>, Shouwen Chen<sup>2\*</sup>, and Suojiang Zhang<sup>1\*</sup>

<sup>1</sup> Beijing Key Laboratory of Ionic Liquids Clean Process, CAS Key Laboratory of Green Process and Engineering, State Key Laboratory of Multiphase Complex Systems, Institute of Process Engineering, Chinese Academy of Sciences, Beijing 100190, China

<sup>2</sup> State Key Laboratory of Biocatalysis and Enzyme Engineering, Environmental Microbial Technology Center of Hubei Province, College of Life Sciences, Hubei University, Wuhan 430062, China

\*Corresponding authors: Yuhong Huang ([yhhuang@ipe.ac.cn](mailto:yhhuang@ipe.ac.cn)), Shouwen Chen ([chenshouwen@hubu.edu.cn](mailto:chenshouwen@hubu.edu.cn)), Suojiang Zhang ([sjzhang@ipe.ac.cn](mailto:sjzhang@ipe.ac.cn))

#### Table of Contents

|                                                 |     |
|-------------------------------------------------|-----|
| Materials and Methods .....                     | S2  |
| <i>In vitro</i> activity assay of enzymes ..... | S3  |
| Pathway assays .....                            | S4  |
| Results .....                                   | S6  |
| References .....                                | S16 |

## Materials and Methods

*Chemicals and agents.* Common chemicals were purchased from Sigma-Aldrich (Shanghai, China), SolarBio (Beijing, China) and Sinopharm Chemical Reagent Co., Ltd. The following enzymes: formate dehydrogenase from *C. boidinii* (CbFDH), formaldehyde dehydrogenase from *Pseudomonas sp.* (PsFaldDH), glucokinase from *S. cerevisiae* (Glc), acetate kinase from *E. coli* (Ack), phosphoglucose isomerase from *S. cerevisiae* (Pgi), glucose-6-phosphate dehydrogenase from *S. cerevisiae* (G6PD) and alcohol dehydrogenase from *S. cerevisiae* (ADH) were all purchased from Sigma-Aldrich (Shanghai, China).

*Strains and growth conditions.* *E. coli* BL21 (DE3) was grown at 37 °C or 20 °C in LB medium for protein expression.

*Plasmid construction and heterologous expression.* The gene encoding the required enzyme was sent to Shanghai Generay Biotechnology company for proceeding several steps, including codon optimization, gene synthesis, construction on the pETDuet-1 vector with a 6x His-tag, and heterologous expression in *E. coli* BL21 (DE3). For expression, the plasmids containing the constructed gene were first grown in 50 mL of LB medium at 37 °C overnight with continuous shaking. Afterwards, 2 mL of the overnight culture was transferred to 250 mL of fresh LB medium and cultured until reaching an optical density at 600 nm (OD<sub>600</sub>) of 0.6-1.0. At this point, cells were induced with 0.1 mM IPTG (isopropyl β-D-1-thiogalactopyranoside) and incubated at 20 °C for 20 h. Following induction, the cells were harvested and resuspended in a lysis buffer consisting of 30 mM Tris-HCl (pH 7.4), 50 mM sodium phosphate, and 150 mM NaCl. To purify the enzymes, a HisTrap HP crude affinity column (5 mL, 17524802, Cytiva) and a HiTrap Desalting column (5 mL, 17140801, Cytiva) were used in conjunction with fast protein liquid chromatography (FPLC) on an ÄKTA™ pure 25 system. During the purification process, a running buffer A (50 mM sodium phosphate, 150 mM NaCl, and pH 7.4) and B (50 mM sodium phosphate, 150 mM NaCl, 500 mM imidazole and pH 7.4) were employed. The purified proteins were then stored at -80 °C for future analysis. The purity of the enzymes was assessed using SDS-PAGE (sodium

dodecyl sulfate-polyacrylamide gel electrophoresis). Additionally, the protein concentration of the purified enzymes was determined using the Pierce™ BCA Protein Assay Kit (23225, Thermo Scientific), with bovine serum albumin (BSA) serving as a standard for comparison.

*The thermodynamic data analysis of pathway.* The total Gibbs energy change ( $\Delta rG^m$ ) and the max-min driving force (MDF) were calculated by the website of Quilibrator (<http://equilibrator.weizmann.ac.il>) using the ionic strength  $I = 0.15$ , pH 7.5, and 1 mM concentration of each metabolite<sup>1</sup>.

*GC-MS analysis.* Ethanol was analyzed by Nexis GC-2030 gas chromatograph (GC) or gas chromatography-tandem mass spectrometry (GC-MS, Agilent Technologies). The GC was applied with an SH-Rtx-Wax polar column (60 m  $\times$  0.32 mm  $\times$  1.0  $\mu$ m) and a GC-flame ionization detector (FID). The GC oven temperature was set to start at 40 °C for 3 min, and immediately follow by a ramp of 45 °C/min to 235 °C and a hold for 3 min. An injection volume of 0.5  $\mu$ L with a split ratio of 25 in constant pressure mode with 9.52 psi at the inlet was used<sup>2</sup>. For full-scan data acquisition, the MS was set to scan from 20 to 200 atomic mass units. The ethanol concentration was calculated by using an external standard method with the corresponding calibration curve established by using the known concentrations of ethanol. Data analysis for GC-MS was performed with NIST Database.

### ***In vitro* activity assay of enzymes**

All assays were performed with 50 mM potassium phosphate buffer at pH 7.5 and conducted at 25 °C unless otherwise stated.

*Conditions for FDH Assays.* A reaction volume of 1 mL was made up of 1 mM NADH, 200  $\mu$ g FDH, and a buffer solution saturated with CO<sub>2</sub> for 0.5 h in advance. Reactions were conducted for 1 h and the assay results were determined by the measurements of the consumption of NADH at 340 nm.

*Conditions for FaldDH Assays.* A reaction volume of 1 mL was composed of 1 mM NADH, 10 mM sodium formate, and 200  $\mu$ g FaldDH. The assay results were determined by the measurements of the consumption of NADH at 340 nm.

*Conditions for Phi Assays.* A 500  $\mu$ L reaction mixture was made up of 5 mM  $MgCl_2$ , 0.26 mM  $NADP^+$ , 5 mM R5P, 5 mM formaldehyde, 6.1  $\mu$ g Pgi, 1.1  $\mu$ g G6PD, 48  $\mu$ g Rpi, 9.6  $\mu$ g Hps and 0.0048  $\mu$ g Phi. The assay results were determined by the measurements of the production of NADPH at 340 nm.

*Conditions for Fpk Assay.* A 500  $\mu$ L reaction was made up of 5 mM  $MgCl_2$ , 0.26 mM  $NADP^+$ , 1 mM thiamine pyrophosphate (TPP), 0.2 mM ADP, 10 mM glucose, 10 mM F6P, 1.6  $\mu$ g F/Xpk, 30  $\mu$ g Ack, 2 U Glk, and 2 U G6PD. The assay results were determined by the measurements of the NADPH generation at 340 nm.

*Conditions for Tal, Tkt, Rpe, and Rpi Assays.* A 500  $\mu$ L reaction mixture was made up of 5 mM R5P, 5 mM  $MgCl_2$ , 1 mM TPP, 0.26 mM  $NADP^+$ , 0.4 U Glk and 0.4 U Pgi. For coupling reactions, high enzyme amounts were used: 260  $\mu$ g Tal, 8  $\mu$ g Tkt, 14  $\mu$ g Rpe, and 12  $\mu$ g Rpi. The tested enzyme in each assay was used at the following levels: 0.5  $\mu$ g Tal, 0.3  $\mu$ g Tkt, 0.2  $\mu$ g Rpe, and 0.1  $\mu$ g Rpi. The assay results were determined by the measurements of the NADPH generation at 340 nm.

*Conditions for ALDH Assay.* A 500  $\mu$ L reaction mixture was made up of 5 mM  $MgCl_2$ , 0.3 mM NADH, 1 mM butyryl-CoA, and 10  $\mu$ g ALDH. The assay results were determined by the measurements of the decrease in NADH at 340 nm.

*Conditions for Pta Assays.* A 500  $\mu$ L reaction mixture was made up of 0.2 mM NADH, 2 mM acetyl-phosphate, 5 mM CoA, 0.077  $\mu$ g Pta, and 44  $\mu$ g ALDH. The assay results were determined by the measurements of the NADPH generation at 340 nm.

*Screening of Hps.* The 500  $\mu$ L reaction mixture was made up of 5 mM  $MgCl_2$ , 0.26 mM  $NADP^+$ , 5 mM R5P, 5 mM formaldehyde, 6.1  $\mu$ g Pgi, 1.1  $\mu$ g G6PD, 48  $\mu$ g Rpi, 47  $\mu$ g Phi and 1.9  $\mu$ g Hps. The *in vitro* enzyme activities of Hps from different strains were determined by the measurements of the NADPH generation at 340 nm.

### **Pathway assays**

All assays were performed with 50 mM potassium phosphate buffer at pH 7.5 and conducted at 25 °C unless otherwise stated. External standard method was used to establish the ethanol standard curve for the qualitative analysis of the product yield in the sample.

*Screening FDHs and FaldDHs.* A reaction volume of 1 mL was made up of 1 mM NADH, 200 µg CbFDH/ PaFDH/ ΔPaFDH48, and 200 µg PsFaldDH/ BmFaldDH/ SzFaldDH. During the reaction, the buffer solution was saturated with CO<sub>2</sub> 0.5 h in advance, and the prepared system reacts were bubbled with CO<sub>2</sub> for 1 h. The assay results were determined by the measurements of the NADH consumption at 340 nm.

*For Formaldehyde to Ethanol.* A reaction volume of 1 mL was made up of 0.2 mM NADH, 5 mM MgCl<sub>2</sub>, 10 mM sodium formate, 0.5 mM TPP, 6 mM formaldehyde, 200 µg FDH, 150 µg Hps, 50 µg Phi, 300 µg Tkt, 500 µg Tal, 90 µg Fpk, 50 µg Rpe, 50 µg Rpi, 50 µg Pta, 300 µg AIDH and 0.1U ADH. The reaction time taken for formaldehyde to ethanol was 4 h. Tal was excluded for the control. Samples were analyzed by GC-MS.

*Concentration optimization for Fpk.* A reaction volume of 1 mL was made up of 0.2 mM NADH, 5 mM MgCl<sub>2</sub>, 10 mM sodium formate, 0.5 mM TPP, 6 mM formaldehyde, 200 µg FDH, 150 µg Hps, 50 µg Phi, 300 µg Tkt, 500 µg Tal, 50 µg Rpe, 50 µg Rpi, 50 µg Pta, 300 µg AIDH and 0.1 U ADH. Fpk was set at different concentrations in this system. Samples were reacted for 4 h, then analyzed by GC-MS.

*For HCO<sub>3</sub><sup>-</sup> to Ethanol.* A reaction volume of 1 mL was made up of 500 mM NaHCO<sub>3</sub>, 5 mM NADH, 5 mM MgCl<sub>2</sub>, 0.5 mM R5P, 1 mM CoA, 0.5 mM TPP, and the amount of enzyme are as follows: 200 µg FDH, 200 µg FaldDH, 150 µg Hps, 30 µg Phi, 300 µg Tkt, 500 µg Tal, 30 µg Rpe, 30 µg Rpi, 140 µg Fpk, 30 µg Pta, 300 µg AIDH, 0.1 U ADH. The reactions were conducted at 37 °C for 6 h. Hps was excluded for the control. At each time point, samples were mixed with 8 M urea in a ratio of 10:1 to quench the reaction, then analyzed by GC-MS.

*One Step for CO<sub>2</sub> to Ethanol.* A reaction volume of 1 mL was made up of 5 mM NADH, 5 mM MgCl<sub>2</sub>, 0.5 mM R5P, 1mM CoA, 0.5 mM TPP, and the amount of enzyme are as follows: 200 µg FDH, 200 µg FaldDH, 150 µg Hps, 30 µg Phi, 300 µg Tkt, 500 µg Tal, 30 µg Rpe, 30 µg Rpi, 140 µg Fpk, 30 µg Pta, 300 µg AIDH, 0.1 U ADH. During the reaction, the buffer solution was saturated with CO<sub>2</sub> 0.5 h in advance, and the reactions were conducted for 2 h. Hps was excluded for the control, and samples were

analyzed by GC-MS.

*Two-Step for CO<sub>2</sub> to Ethanol.* A reaction volume of 1 mL was made up of 5 mM NADH, 5 mM MgCl<sub>2</sub>, 0.5 mM R5P, 1 mM CoA, 0.5 mM TPP, and the amount of enzyme are as follows: 200 µg FDH and 200 µg FalddDH, 150 µg Hps, 30 µg Phi, 300 µg Tkt, 500 µg Tal, 30 µg Rpe, 30 µg Rpi, 140 µg Fpk, 30 µg Pta, 300 µg AIDH, 0.1 U ADH. During the reaction, the buffer solution was saturated with CO<sub>2</sub> 0.5 h in advance, and Tkt, Tal, Rpe, Fpk, Pta, AIDH and ADH were added at 1 h delayed. Hps was excluded for the control. At each time point, samples were mixed with 8 M urea in a ratio of 10:1 to quench the reaction, then analyzed by GC-MS.

## Results

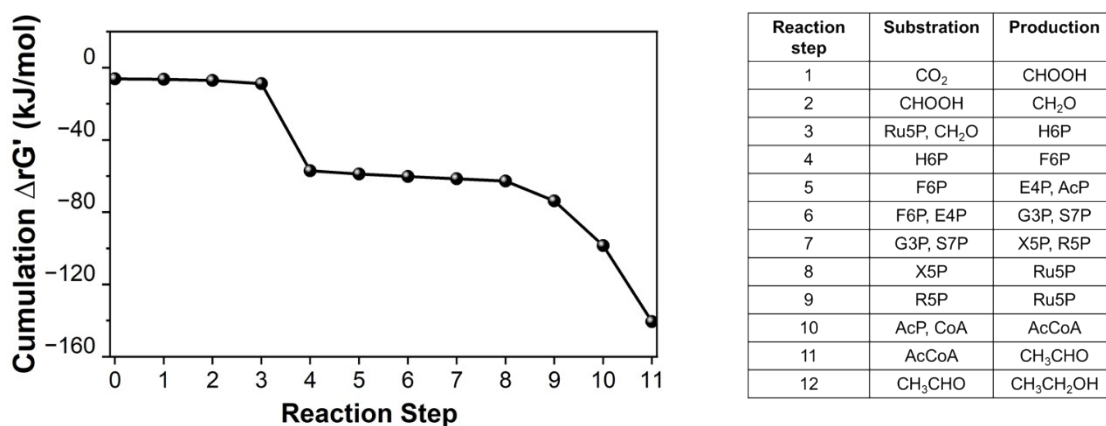

**Fig S1.** The results of thermodynamic data analysis in MDF-optimized concentrations.

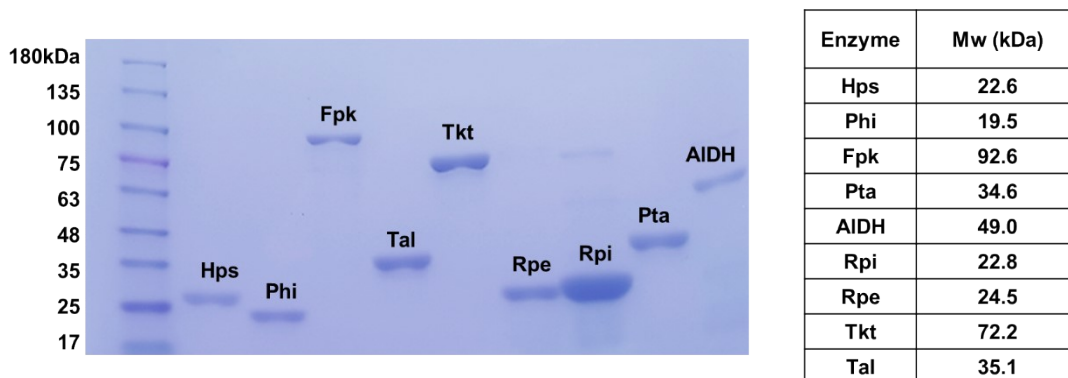

**Fig S2.** SDS-PAGE of 9 recombinant purified enzymes for the CTE pathways. CTE,

CO<sub>2</sub> to ethanol; Hps, 3-hexulose-6-phosphate synthase; Phi, phosphohexulose isomerase; F/Xpk, phosphoketolase; Pta, phosphate acetyltransferase; Tal, transaldolase; Tkt, transketolase; Rpi, ribose-5 phosphate isomerase; Rpe, ribulose 5-phosphate epimerase; ALDH, acetaldehyde dehydrogenase.

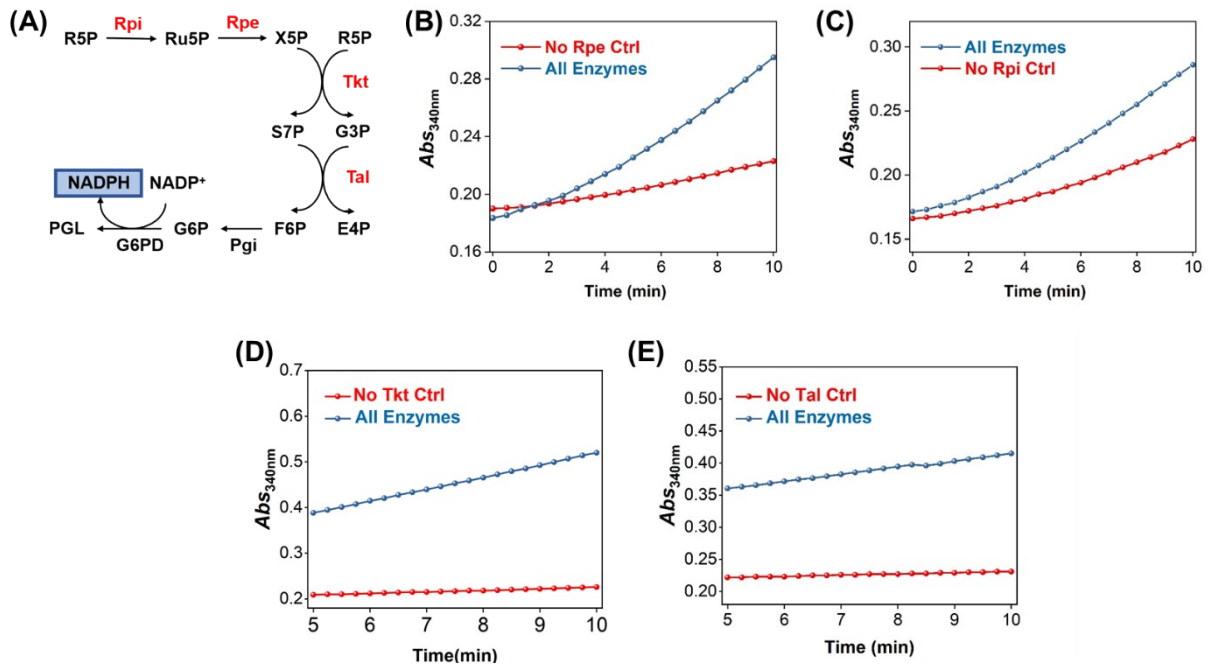

**Fig S3.** *In vitro* enzyme activity analysis of Rpi, Rpe, Tkt, Tal. Ru5P, ribulose-5 phosphate; F6P, fructose-6-phosphate; E4P, erythrose 4-phosphate; G3P, glyceraldehyde 3-phosphate; S7P, sedoheptulose 7-phosphate; R5P, ribose 5-phosphate; X5P, xylulose 5-phosphate.; PGL, 6-phosphogluconolactone; G6P, Glucose 6-phosphate. (A). The above enzyme activities were represented by the measurements of the production of NADPH. (B) *In vitro* enzyme activity of Rpe; (C) *In vitro* enzyme activity of Rpi; (D) *In vitro* enzyme activity of Tkt; (E) *In vitro* enzyme activity of Tal.

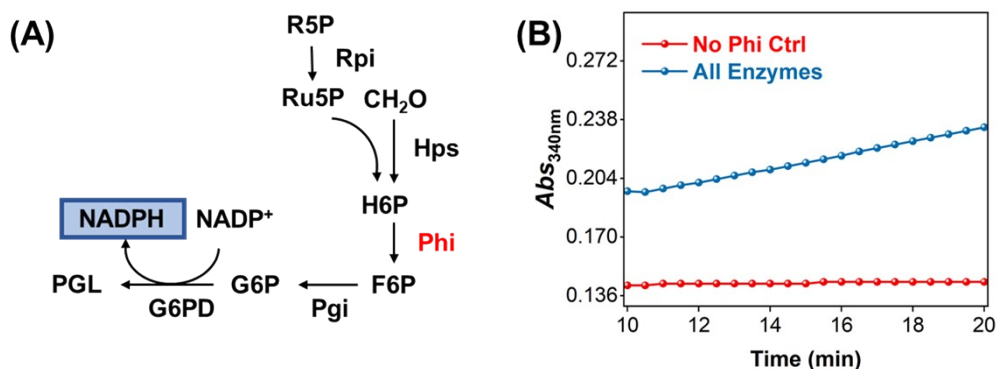

**Fig S4.** *In vitro* enzyme activity verification of Phi. (A) Pathway for Phi activity assays. (B) The activity of Phi *in vitro* represented by the measurements of the NADPH generation.

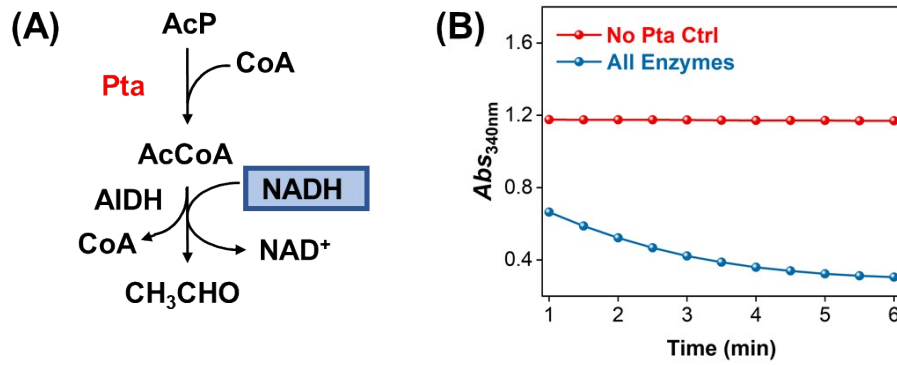

**Fig S5.** *In vitro* enzyme activity verification of Pta. CoA, coenzyme A; AcCoA, acetyl coenzyme A. (A) Pathway for Pta activity assays. (B) The activity of Pta *in vitro* depended on the measurements of the NADH consumption.

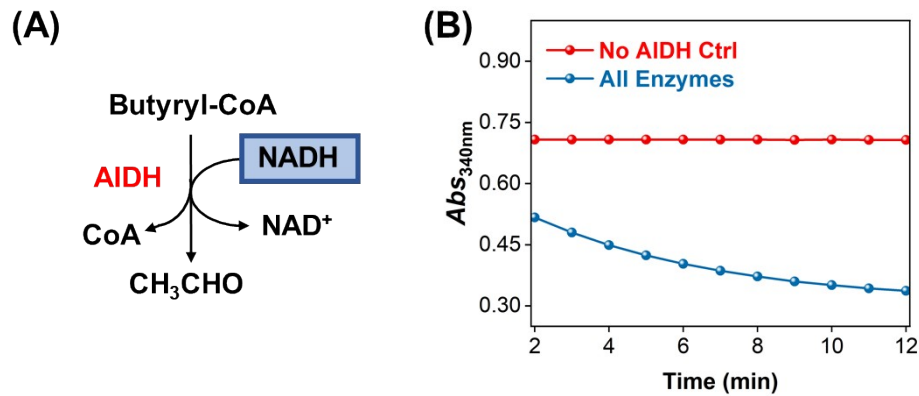

**Figure S6.** *In vitro* enzyme activity verification of AIDH. (A) Pathway for AIDH activity assays. (B) The activity of AIDH *in vitro* represented by the measurements of the consumption of NADH.

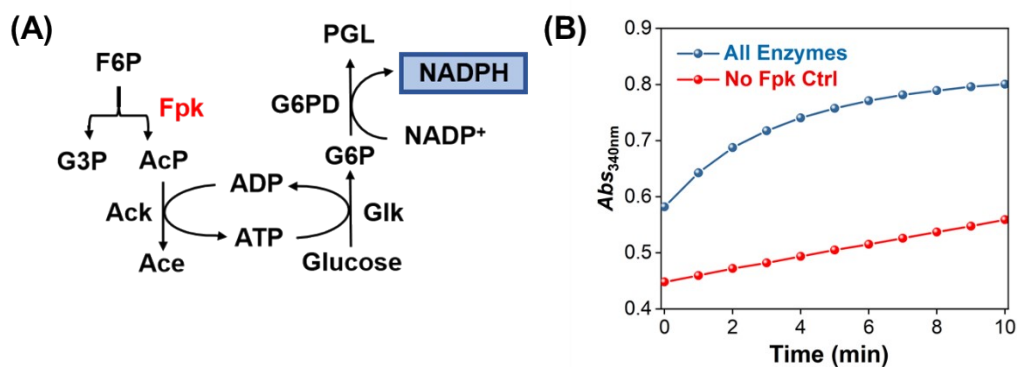



**Figure S7.** *In vitro* enzyme activity verification of Fpk. Ace, acetate; AcP, acetylphosphate; (A) Pathway for Fpk activity assays. (B) The activity of Fpk *in vitro* represented by the measurements of the generation of NADPH.

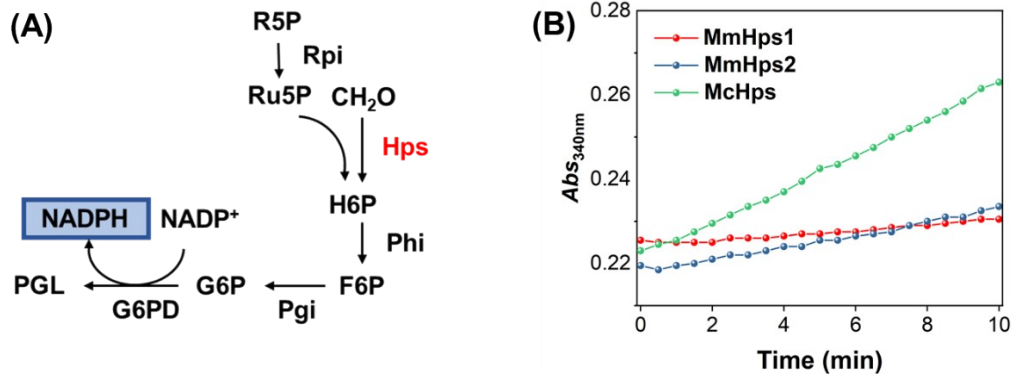

**Figure S8.** Comparison of *in vitro* enzyme activity of Hps screened by PPR. (A) Pathway for Hps activity assays. (B) The activity of Hps *in vitro* represented by the measurements of the NADPH generation.

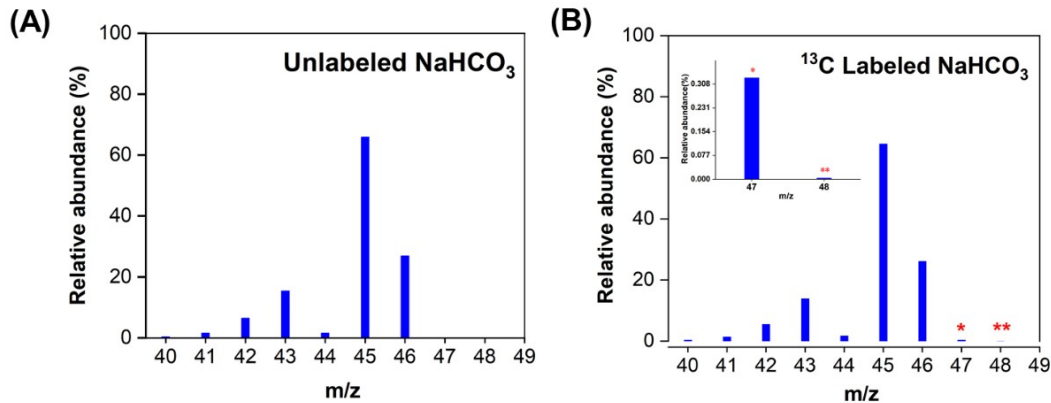

**Figure S9.** <sup>13</sup>C Tracing from <sup>13</sup>C-NaHCO<sub>3</sub> to ethanol. All spectra were normalized to the most abundant internal peak. (A) Mass spectrum of ethanol experimentally produced from unlabeled NaHCO<sub>3</sub> and R5P using the full CTE pathway. (B) Mass spectrum of ethanol experimentally produced from <sup>13</sup>C-HCO<sub>3</sub><sup>-</sup> and unlabeled R5P using the full CTE pathway. One-labeled ethanol: [1-<sup>13</sup>C]-ethanol, [2-<sup>13</sup>C]-ethanol (one red asterisks); and double-labeled [1,2-<sup>13</sup>C]-ethanol (two red asterisks).

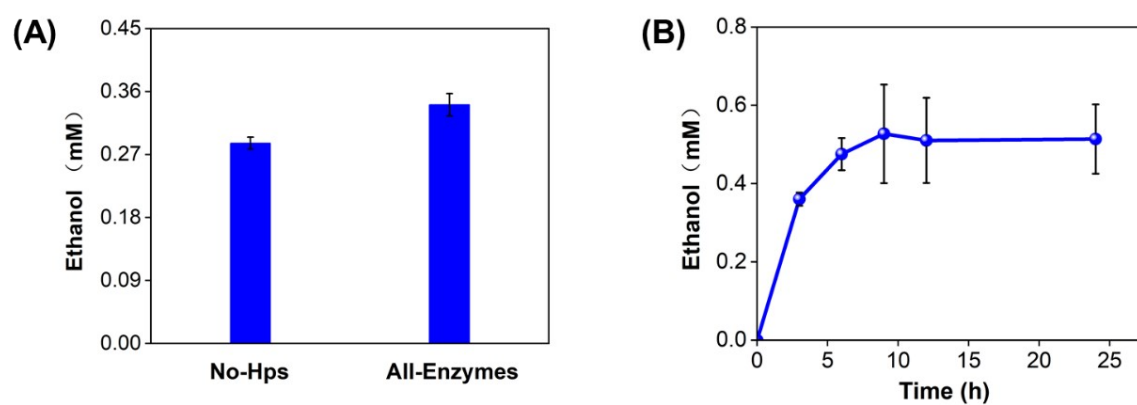

**Figure S10.** Yield of ethanol from  $\text{HCO}_3^-$  through the full CTE pathway. (A) Ethanol production with Hps as the experimental variable. (B) Time course diagram of ethanol yield.

**Table S1.** Comparison of artificial *in vitro* carbon-fixation pathways

| Pathway  | Substrate                                                                                          | Product                         | ATP/CO <sub>2</sub><br>(mol/mol) | Number of<br>reactions | Carbon fixation rate<br>[nmol/(min·mg)] | Oxygen<br>tolerance | Ref          |
|----------|----------------------------------------------------------------------------------------------------|---------------------------------|----------------------------------|------------------------|-----------------------------------------|---------------------|--------------|
| rGPS-MCG | NaHCO <sub>3</sub> , crotonyl-CoA,<br>phosphoenolpyruvate                                          | acetyl-CoA,<br>pyruvate, malate | 2.5                              | 19                     | 28.5                                    | Yes                 | <sup>3</sup> |
| CETCH    | propionyl-CoA, NaHCO <sub>3</sub>                                                                  | glyoxylate                      | 1                                | 17                     | 5.0                                     | Yes                 | <sup>4</sup> |
| POAP     | sodium acetate                                                                                     | oxlate                          | 1                                | 4                      | 8.0                                     | No                  | <sup>5</sup> |
| ASAP     | NaHCO <sub>3</sub><br>methanol (chemically<br>hydrogenated by CO <sub>2</sub> and H <sub>2</sub> ) | starch                          | 0.5                              | 11                     | 22                                      | Yes                 | <sup>4</sup> |
| CTE      | CO <sub>2</sub>                                                                                    | ethanol                         | 0                                | 11                     | 4.3                                     | Yes                 | This work    |

**Table S2.** Summary of origins of CTE enzymes

| ABB.             | Enzyme full name                | Strain                                        | Ref       |
|------------------|---------------------------------|-----------------------------------------------|-----------|
| PaFDH            | Formate dehydrogenase           | <i>Paracoccus</i> sp.<br>MKU1                 | 6         |
| $\Delta$ PaFDH48 | Formate dehydrogenase mutant    | <i>Paracoccus</i> sp.<br>MKU1                 | 7         |
| SzFaldDH         | Formaldehyde dehydrogenase      | <i>Streptomyces</i><br><i>zinciresistens</i>  | 8         |
| BmFaldDH         | Formaldehyde dehydrogenase      | <i>Burkholderia</i><br><i>multivorans</i>     | 9         |
| BsHps            | 3-hexulose-6-phosphate synthase | <i>Bacillus subtilis</i>                      | 2         |
| BmHps            | 3-hexulose-6-phosphate synthase | <i>Bacillus</i><br><i>methanolicus</i>        | 10        |
| McHps            | 3-hexulose-6-phosphate synthase | <i>Methylococcus</i><br><i>capsulatus</i>     | 2         |
| MmHps1           | 3-hexulose-6-phosphate synthase | <i>Methylocaldum</i><br><i>marinu</i>         | This work |
| MmHps2           | 3-hexulose-6-phosphate synthase | <i>Methylocaldum</i><br><i>marinu</i>         | This work |
| Phi              | 6-phospho-3-hexuloisomerase     | <i>Methylobacillus</i><br><i>flagellatus</i>  | 10        |
| Tal              | Transaldolase                   | <i>Escherichia coli</i><br>(JCL16)            | 2         |
| Tkt              | Transketolase                   | <i>Escherichia coli</i><br>(JCL16)            | 2         |
| Rpi              | Ribose-5 phosphate isomerase    | <i>Escherichia coli</i><br>(JCL16)            | 2         |
| Rpe              | Ribulose 5-phosphate epimerase  | <i>Escherichia coli</i><br>(JCL16)            | 2         |
| Fpk              | Phosphoketolase                 | <i>Bifidobacterium</i><br><i>adolescentis</i> | 2         |
| Pta              | Phosphate acetyltransferase     | <i>Bacillus subtilis</i><br>(strain 168)      | 2         |
| AIDH             | Aldehyde dehydrogenase          | <i>Salmonella</i><br><i>enterica</i>          | 2         |

**Table S3.** List of combinatorial reactions.

| Enzyme | Reaction                                                                                                                                                           | Direction         | EC number |
|--------|--------------------------------------------------------------------------------------------------------------------------------------------------------------------|-------------------|-----------|
| FDH    | $\text{NADH} + \text{CO}_2 \rightleftharpoons \text{NAD}^+ + \text{formate}$                                                                                       | $\leftrightarrow$ | 1.2.1.2   |
| FaldDH | $\text{NADH} + \text{formate} \rightleftharpoons \text{NAD}^+ + \text{formaldehyde} + \text{H}_2\text{O}$                                                          | $\leftrightarrow$ | 1.2.1.46  |
| Hps    | $\text{D-ribulose 5-phosphate} + \text{formaldehyde} \rightleftharpoons \text{D-arabino-hex-3-ulose 6-phosphate}$                                                  | $\rightarrow$     | 4.1.2.43  |
| Phi    | $\text{D-arabino-hex-3-ulose 6-phosphate} \rightleftharpoons \text{D-fructose 6-phosphate}$                                                                        | $\leftrightarrow$ | 5.3.1.27  |
| Tal    | $\text{D-glyceraldehyde 3-phosphate} + \text{D-sedoheptulose 7-phosphate} \rightleftharpoons \beta\text{-D-fructose 6-phosphate} + \text{D-erythrose 4-phosphate}$ | $\leftrightarrow$ | 2.2.1.2   |
| Tkt    | $\text{D-glyceraldehyde 3-phosphate} + \text{D-sedoheptulose 7-phosphate} \rightleftharpoons \text{aldehydo-D-ribose 5-phosphate} + \text{D-xylulose 5-phosphate}$ | $\leftrightarrow$ | 2.2.1.1   |
| Rpi    | $\text{aldehydo-D-ribose 5-phosphate} \rightleftharpoons \text{D-ribulose 5-phosphate}$                                                                            | $\leftrightarrow$ | 5.3.1.6   |
| Rpe    | $\text{D-ribulose 5-phosphate} \rightleftharpoons \text{D-xylulose 5-phosphate}$                                                                                   | $\leftrightarrow$ | 5.1.3.1   |
| Fpk    | $\text{F6P} + \text{phosphate} \rightleftharpoons \text{acetyl phosphate} + \text{D-erythrose 4-phosphate} + \text{H}_2\text{O}$                                   | $\rightarrow$     | 4.1.2.9   |
| Xpk    | $\text{phosphate} + \text{D-xylulose 5-phosphate} \rightleftharpoons \text{D-glyceraldehyde 3-phosphate} + \text{acetyl phosphate} + \text{H}_2\text{O}$           | $\rightarrow$     | 4.1.2.22  |
| Pta    | $\text{acetyl-CoA} + \text{phosphate} \rightleftharpoons \text{acetyl phosphate} + \text{CoA}$                                                                     | $\leftrightarrow$ | 2.3.1.8   |
| AIDH   | $\text{acetaldehyde} + \text{CoA} + \text{NAD}^+ \rightleftharpoons \text{acetyl-CoA} + \text{H}^+ + \text{NADH}$                                                  | $\leftrightarrow$ | 1.2.1.10  |

**Table S4.** List of synthesized enzyme sequences.

---

|       |                                                                                                                                                                                                                                                                                                                                                                                                                                                                                                                                                                                                                                                                                                                                                         |
|-------|---------------------------------------------------------------------------------------------------------------------------------------------------------------------------------------------------------------------------------------------------------------------------------------------------------------------------------------------------------------------------------------------------------------------------------------------------------------------------------------------------------------------------------------------------------------------------------------------------------------------------------------------------------------------------------------------------------------------------------------------------------|
| Rpi   | MTQDELKKA VGWAALQYVQPGTIVGVGTGSTAAHFIDALGT<br>MKGQIEGAVSSSDASTEKLKSLGIHVFDLNEVDSLGIYVDGAD<br>EINGHMQMIKGGGAAL TREKIIASVAEKFICIADASKQVDILGK<br>FPLPVEVIPMARS AVARQLVKLGGRPEYRQGVVTDNGNVILD<br>VHGMEILDPIAMENAINAIPGVVTVGLFANRGADVALIGTPDG<br>VKTIVK                                                                                                                                                                                                                                                                                                                                                                                                                                                                                                      |
| Tkt   | MSSRKELANAIRALSMDAVQKAKSGHPGAPMGMADIAEVLW<br>RDFLKHNPNQPSWADRDRFVLSNGHGSMLIY SLLHLTGYDLP<br>MEELKNFRQLHSKTPGHPEVGYTAGVETTTGPLGQGIANAVG<br>MAIAEKTLAAQFNRP GHDIVDHYTYAFMGDGCMMEGISHEVC<br>SLAGTLKLGKLI AFYDDNGISIDGHVEGWFTDDTAMRFEAYG<br>WHVIRDIDGHDAASIKRAVEEARAVTDKPSLLMCKTIIGFGSPN<br>KAGTHDSHGAPLGDAEIALTREQLGWKYAPFEIPSEIYAQWDA<br>KEAGQAKESAWNEKFAAYAKAYPQEA AEFTRRMKGEMP SDF<br>DAKAKEFIAKLQANPAKIASRKASQNAIEAFGPLLPEFLGGSAD<br>LAPSNLTLWSGSKAINEDAAGNYIHYGVREFGMTAIANGISLH<br>GGFLPYTSTFLMFVEYARNAVRMAALMKQRQVMVYTHDSIG<br>LGEDGPTHQPVEQVASLRVTPNMSTWRPCDQVESAVAWKYG<br>VERQDGPTALILSRQNLAQQERTEEQLANIARGGYVLKDCAG<br>QPELIFIATGSEVELAVAAYEKLTAEGVKARVVSMPSTDAFDK<br>QDAAYRESVLPKAVTARVAVEAGIADYWKYVGLNGAIVGM<br>TTFGESAPAELLFEEFGFTVDNVVAKAKELL |
| Tal   | MTDKLTSLRQYTTVVADTG DIAAMKLYQPQDATTNPSLILNA<br>AQIPEYRKLIDDAVAWAKQQSNDRAQQIVDATDKLAVNIGLEI<br>LKLVPGRISTEVDARLSYDTEASIAKAKRLIKLYNDAGISNDRI<br>LIKLASTWQGIRAAEQLEKEGINCNLTLLFSFAQARACAEAGV<br>FLISPFVGRILDWYKANTDKKEYAPAEDPGVVSVSEIYQYYKE<br>HGYETVVMGASFRNIGEILELAGCDRLTIAPALLKELAESEGAI<br>ERKLSYTGEVKARPARITSEFLWQHNQDPM AVDKLAEGIRKF<br>AIDQEKLEKMIGDLL                                                                                                                                                                                                                                                                                                                                                                                              |
| F/Xpk | MTSPVIGTPWKKNAPVSEE AIEGVDKYWRAANYLSIGQIYLR<br>SNPLMKEPFTREDVKHRLVGHWGTT PGLNFLIGHINRLIADHQ<br>QNTVIIMGPGHGGPAGTAQSYLDGTYTEYFPNITKDEAGLQKF<br>FRQFSYPGGIPSHYAPETPGSIHEGGELGYALSHAYGAVMNNP<br>SLFVPAIVGDGEAETGPLATGWQSNKLNPRTDGIVLPILHLNG<br>YKIANPTILSRISDEELHEFFHGMGYEPYEFVAGFDNEDHLSIH<br>RRFAELFETVFDEICDIKAAAQTDDMTRPFYPMIIFRTPKGWTC                                                                                                                                                                                                                                                                                                                                                                                                                |

---

---

PKFIDGKKTEGSWRSHQVPLASARDTEAHFEVLKNWLESYKP  
EELFDENGAVKPEVTA FMPTGELRIGENPNANGGRIEELKLP  
KLEDYEVKEVAEYGHGWGQLEATRRLGVYTRDIKNNPDSFRI  
FGPDETASNRLQAAYDVTNKQWDAGYLSAQVDEHMAVTGQ  
VTEQLSEHQMEGFLEGYLLTGRHGIWSSYESFVHVIDSMLNQH  
AKWLEATVREIPWRKPISSMNLLVSSHVWRQDHNGFSHQDPG  
VTSVLLNKCFNNDHVIGIYFPVDSNMLLA VAEKCYKSTNKINA  
IIAGKQPAATWLTLD EARAELEKGA AEWKWASNVKSNDEAQI  
VLAATGDVPTQEIMAAADKLDAMGIKFKVVNVVDLVKLQSA  
KENNEALSDEEFAELFTEDKPVLFAYHSYARDVRGLIYDRPNH  
DNFNVHGYEEQGSTTTPYDMVRVNNIDRYELQAEALRMIDAD  
KYADKINELEAFRQEA FQFAVDNGYDHPDYTDWVYSGVNTN  
KQGAISATAATAGDNE

---

Phi MNKYQELVVNKL TNVINNTAEGYDDKILSMVDAAGRTFLGG  
AGRSLVSRFFAMRLVHAGYQVSMVGEVVTPSIQAGDLFIVIS  
GSGSTETLMPLVRKAKSQGAKVIVISMKAQSPMAELADLVVPI  
GGNDAHAFDKTHGMPMGTIFELSTLWFLEATIAKLIDQKGLTE  
EGMRAIHANLE

---

Pta MADLFSTVQEKVAGKDVKIVFPEGLDERILEAVSKLAGNKVL  
NPVIGNENEIQAKAKELNLTGGVKIYDPHTYEGMEDLVQAF  
VERRKGKATEEQARKALLDENYFGTMLVYKGLADGLVSGAA  
HSTADTVRPALQIIKTKEGVKKTSGVFIMARGEEQYVFADCAI  
NIAPDSQDLAEIAIESANTAKMFDIEPRVAMLSFSTKGSASDE  
TEKVADAVKIAKEKAPELTLDGEFQFDAAFVPSVAEKKAPDSE  
IKGDANVVFPSLEAGNIGYKIAQRLGNFEAVGPILQGLNMPV  
NDLSRGCNAEDVYNLALITAAQAL

---

BsHps MELQLALDLVNIPEAIELVKEVEQYIDVVEIGTPVVINEGLRAV  
KEIKEAFPQLKVLADLKIMDAGGYEIMKASEAGADIITVLGAT  
DDATIKGAVEEA KKQKKKILVDMINVKDIESRAKEIDALGV DY  
ICVHTGYDLQAE GKN SFEELTTIKNTVKNAKTAIAGGIKLD TLP  
EVIQQK PDLVIVGGGITSAADKAETASKMKQLIVQG

---

McHps MARPLIQLALDTLDIPQTLKSLTAPYVDIFEIGTPSIKHNGIA  
LVKEFKKRFPNKLLLVDLKTMDAGEYEATPFFAAGADITTVLG  
VAGLATIKGVINAANKHNAEVQVDLINVPDKAACARES AKAG  
AQIVGIHTGLDAQAAGQTPFADLQAI AKLGLPVRISVAGGIKAS  
TAQQVVKTGANIIVVGAAIYGAASPADAAREIYEQVVAASA

---

---

|       |                                                                                                                                                                                                                                                        |
|-------|--------------------------------------------------------------------------------------------------------------------------------------------------------------------------------------------------------------------------------------------------------|
| BmHps | <p>MELQLALDLVNIEEAKQVVAEVQEYVDIVEIGTPVIKIWGLQA<br/> VKA VKDAFPHLQVLADMKTMDAAA YEVAKAAEHGADIVTIL<br/> AAAEDVSIKGAVEEAKKLGKKILVDMI AVKNLEERAKQVDEM<br/> GVDYICVHAGYDLQAVGKNPLDDLKRIKAVVKNAKTAIAGGI<br/> KLETLPEVIKAEPDLVIVGGGIANQTDKKAAA EKINKLVKQGL</p> |
|-------|--------------------------------------------------------------------------------------------------------------------------------------------------------------------------------------------------------------------------------------------------------|

---

|        |                                                                                                                                                                                                                                                          |
|--------|----------------------------------------------------------------------------------------------------------------------------------------------------------------------------------------------------------------------------------------------------------|
| MmHps1 | <p>MARPLIQLALDSL DVNQTLKLAGLAAPYVDIFEIGTPCIKHNGV<br/> SLVKELRKKYPNKLILVDLKTMDAGEYEATPFYAAGADICTVL<br/> GVSGLPTIAGVIKAA NAHNAEVQVDLINVPDKIACARES AKLG<br/> AHIIGVHTGLDAQAAGQTPFADLQAI SRLKLPVRISVAGGIKQS<br/> TVQQVARAGANIVVVGAAIYGAASPADAAREICELASAA</p> |
|--------|----------------------------------------------------------------------------------------------------------------------------------------------------------------------------------------------------------------------------------------------------------|

---

|        |                                                                                                                                                                                                                                                                                                                                                                                                                                                                      |
|--------|----------------------------------------------------------------------------------------------------------------------------------------------------------------------------------------------------------------------------------------------------------------------------------------------------------------------------------------------------------------------------------------------------------------------------------------------------------------------|
| MmHps2 | <p>MARPLIQLALDSL DIDQTLRLANITAPYIDIFEIGTPCIKHNGIAL<br/> VKELKQRY PDKLILVDLKTMDAGEYEATPFFAAGADICTVLG<br/> VSGLP TIAGVIKAAKAHNAEVQVDLINVPDKLVCAREAAKLG<br/> AHIIGVHTGLDAQAAGQTPFADLQAI AKLGLPVRISVAGGINQ<br/> VTVRQVAKTGADIIVVGAAIYGAPSPSDAAREIRELVEGKHHK<br/> FIMSKLAGVLGSTDARYEARLTTMLDRASRVFIAGAGRSGSLVA<br/> KFFGMRLMHGGYDAYIVGEVVTSPSIRKGD LFIVISGSGETETM<br/> LAYTKRAKQMGANIGLITTKDSSTIGDLADV VFRIGSPEQYRK<br/> VIGMPMGTTFELSTLLLLEATVSHIIHAKKIPEEQMRTRHANLE</p> |
|--------|----------------------------------------------------------------------------------------------------------------------------------------------------------------------------------------------------------------------------------------------------------------------------------------------------------------------------------------------------------------------------------------------------------------------------------------------------------------------|

---

|      |                                                                                                                                                                                                                                                                                                                                                                                                                                                                                                                                                        |
|------|--------------------------------------------------------------------------------------------------------------------------------------------------------------------------------------------------------------------------------------------------------------------------------------------------------------------------------------------------------------------------------------------------------------------------------------------------------------------------------------------------------------------------------------------------------|
| AIDH | <p>MNTSELETLIRTILSEQLTPPAQTPVQPQGKGIFQSVSEAIDA AH<br/> QAFLRYQQCPLKTRSAIISAMRQELTPLLAPLAEESANETGMG<br/> NKEDKFLKNKAALDNTPGVEDLTTTALTGDGGMVLF EYSPFG<br/> VIGSVAPSTNPTETIINNSISMLAAGNSIYFSPHPGAKKVSLKLIS<br/> LIEEIAFRCCGIRNLVVTVAEPTFEATQQMMAHPRIAVLAITGG<br/> PGIVAMGMKSGKKVIGAGAGNPPCIVDETADLVKAAEDIINGA<br/> SFDYNLPCIAEKSLIVVESVAERLVQQMQTFGALLLSPADTDK<br/> LRAVCLPEGQANKKLVGKSPSAMLEAAGIAVPAKAPRLLIALV<br/> NADDPWVTSEQLMPMLPVVKVSD FDSALALALKVEEGLHHT<br/> AIMHSQNVSRNLNLAARTLQTSIFVKNGPSYAGIGVGGEGFTTFT<br/> IATPTGEGTTSARTFARSRCVLTNGFSIR</p> |
|------|--------------------------------------------------------------------------------------------------------------------------------------------------------------------------------------------------------------------------------------------------------------------------------------------------------------------------------------------------------------------------------------------------------------------------------------------------------------------------------------------------------------------------------------------------------|

---

## References

1. E. Noor, H. S. Haraldsdottir, R. Milo and R. M. Fleming, *PLoS Comput. Biol.*, 2013, **9**, e1003098.
2. I. W. Bogorad, C. T. Chen, M. K. Theisen, T. Y. Wu, A. R. Schlenz, A. T. Lam and J. C. Liao, *Proc. Natl. Acad. Sci. USA*, 2014, **111**, 15928-15933.



3. S. Luo, P. P. Lin, L.-Y. Nieh, G.-B. Liao, P.-W. Tang, C. Chen and J. C. Liao, *Nat. Catal.*, 2022, **5**, 154-162.
4. S. Bierbaumer, M. Nattermann, L. Schulz, R. Zschoche, T. J. Erb, C. K. Winkler, M. Tinzl and S. M. Glueck, *Chem. Rev.*, 2023, DOI: 10.1021/acs.chemrev.2c00581.
5. L. Xiao, G. Liu, F. Gong, H. Zhu, Y. Zhang, Z. Cai and Y. Li, *ACS Catal.*, 2021, **12**, 799-808.
6. X. Ji, Y. Xue, Z. Li, Y. Liu, L. Liu, P. K. Busk, L. Lange, Y. Huang and S. Zhang, *Green Chem.*, 2021, **23**, 6990-7000.
7. Y. Huang, Y. Xue, X. Ji and S. Zhang, CN202211598631.9, 2022.
8. Y. Huang, X. Ji, Y. Xue, B. Guo and S. Zhang, CN202211599488.5, 2022.
9. R. K. Singh, R. Singh, D. Sivakumar, S. Kondaveeti, T. Kim, J. Li, B. H. Sung, B.-K. Cho, D. R. Kim, S. C. Kim, V. C. Kalia, Y.-H. P. J. Zhang, H. Zhao, Y. C. Kang and J.-K. Lee, *ACS Catal.*, 2018, **8**, 11085-11093.
10. J. E. N. Muller, F. Meyer, B. Litsanov, P. Kiefer, E. Potthoff, S. Heux, W. J. Quax, V. F. Wendisch, T. Brautaset, J. C. Portais and J. A. Vorholt, *Metab. Eng.*, 2015, **28**, 190-201.
